# Glucocalyxin A Inhibits Platelet Activation and Thrombus Formation Preferentially via GPVI Signaling Pathway

Wei Li<sup>1</sup>\*, Xiaorong Tang<sup>1</sup>\*, Wenxiu Yi<sup>1</sup>\*, Qiang Li<sup>1</sup>, Lijie Ren<sup>1</sup>, Xiaohui Liu<sup>1</sup>, Chunjun Chu<sup>2</sup>, Yukio Ozaki<sup>3</sup>, Jian Zhang<sup>2\*</sup>, Li Zhu<sup>1\*</sup>

**1** Cyrus Tang Hematology Center, Soochow University, Suzhou, China, **2** College of Pharmaceutical Science, Soochow University, Suzhou, China, **3** Department of Laboratory Medicine, Faculty of Medicine, University of Yamanashi, Chuo, Yamanashi, Japan

## Abstract

Platelets play a pivotal role in atherothrombosis and the antiplatelet agents have been proved to be useful in preventing onset of acute clinical events including myocardial infarction and stroke. Increasing number of natural compounds has been identified to be potential antiplatelet agents. Here we report the antiplatelet effect of glucocalyxin A (GLA), an *ent*-diterpenoid that we isolated and purified from the aerial parts of *Rabdosia japonica* (Burm. f.) var. *glucocalyx* (Maxim.) Hara, and investigate the molecular mechanisms by which GLA inhibits platelet activation and thrombus formation. The effect of GLA on platelet activation was measured using platelets freshly isolated from peripheral blood of healthy donors. Results showed that pretreatment of human platelets with lower concentrations of GLA (0.01 μg/ml, 0.1 μg/ml) significantly inhibited platelet aggregation induced by collagen (P<0.001) and CRP (P<0.01), a synthetic GPVI ligand, but not by ADP and U46619. Accordingly, GLA inhibited collagen-stimulated tyrosine phosphorylation of Syk, LAT, and phospholipase C $\gamma$ 2, the signaling events in collagen receptor GPVI pathway. GLA also inhibited platelet p-selectin secretion and integrin activation by convulxin, a GPVI selective ligand. Additionally, GLA was found to inhibit low-dose thrombin-induced platelet activation. Using a flow chamber device, GLA was found to attenuate platelet adhesion on collagen surfaces in high shear condition. In vivo studies showed that GLA administration increased the time for complete occlusion upon vascular injury in mice, but did not extend tail-bleeding time when mice were administered with relatively lower doses of GLA. Therefore, the present results provide the molecular basis for the inhibition effect of GLA on platelet activation and its in vivo effect on thrombus formation, suggesting that GLA could potentially be developed as an antiplatelet and antithrombotic agent.

**Citation:** Li W, Tang X, Yi W, Li Q, Ren L, et al. (2013) Glucocalyxin A Inhibits Platelet Activation and Thrombus Formation Preferentially via GPVI Signaling Pathway. PLoS ONE 8(12): e85120. doi:10.1371/journal.pone.0085120

**Editor:** Christian Schulz, King's College London School of Medicine, United Kingdom

**Received:** July 23, 2013; **Accepted:** November 22, 2013; **Published:** December 30, 2013

**Copyright:** © 2013 Li et al. This is an open-access article distributed under the terms of the Creative Commons Attribution License, which permits unrestricted use, distribution, and reproduction in any medium, provided the original author and source are credited.

**Funding:** This work was supported in part by grants from the National Science Foundation of China (NSFC81071410, NSFC81170132), Jiangsu Province's Key Discipline of Medicine (XK201118), the Priority Academic Program Development of Jiangsu Higher Education Institutions of China (L.Z.). The funders had no role in study design, data collection and analysis, decision to publish, or preparation of the manuscript.

**Competing interests:** The authors have declared that no competing interests exist.

\* E-mail: jianzhang@suda.edu.cn (JZ); lizhusong@yahoo.com (LZ)

☉ These authors contributed equally to this work.

## Introduction

Once vascular injury has occurred, platelets are principally activated by locally exposed collagen in the vascular wall and locally generated thrombin, initiating hemostasis[1]. The binding of collagen to GPVI on platelets results in receptor clustering and thereby stimulates the tyrosine phosphorylation of specific tyrosine residues within an associated transmembrane protein, the Fc receptor  $\gamma$ -chain (FcR $\gamma$ -chain)[2,3]. This leads to the recruitment of signaling proteins such as the Src kinase, the tyrosine kinase Syk, PLC $\gamma$ 2, phosphoinositide 3-kinase (PI3K) and MAPKS[3,4], resulting in the inside-out

activation of the integrin  $\alpha$ IIb $\beta$ 3 and the release of the secondary mediators, such as ADP and thromboxane A2 (TxA2), culminating in platelet aggregation mediated by fibrinogen binding to  $\alpha$ IIb $\beta$ 3 and thrombus formation.

The modulation of platelet activity using specific pharmacological agents has proven to be a successful strategy for the prevention of thrombosis[5]. Mechanistically, current antiplatelet drugs include ADP antagonists, COX-1 inhibitors, antagonists of the major platelet integrin  $\alpha$ IIb $\beta$ 3, and phosphodiesterase inhibitors. However, the risk of uncontrolled bleeding due to their inherent antihemostatic effects limited their clinical use[6]. Therefore, tremendous effort has been

made in the past years on the identification of novel pharmacological targets with both effective and safe antiplatelet effect to prevent occlusive thrombus formation in myocardial infarction and stroke. The search for compounds to prevent platelet activation has included the investigation of natural compounds that are able to inhibit platelet function, such as quercetin[7], polyphenols[8], and salvianolic acid A[9].

*Rabdosia japonica* (Burm. f.) var. *glaucocalyx* (Maxim.) Hara is a perennial herb that is distributed widely in East Asia, and the dried whole plant of *Rabdosia japonica* (Burm. f.) var. *glaucocalyx* (Maxim.) Hara has been used traditionally as a folk medicine for treating gastrointestinal disorders, tumors, and inflammatory diseases[10,11]. Recent reports showed that glaucocalyxin A (GLA) isolated from *Rabdosia japonica* has an anti-neuroinflammatory effect on LPS-stimulated microglial cells[12], strong cytotoxic effects on normal liver cell line BRL and several tumor cell lines in vitro[13], and apoptotic effects on human leukemia HL-60 cells through mitochondria-mediated death pathway or GSH perturbation[14,15]. Although there were studies of GLA effect on rabbit platelet function[16,17], the mechanism by which GLA affects platelets and its effect on thrombus formation in vivo remains unclear. In the present study, we tested the effect of GLA on platelet activation in response to a variety of agonists and thrombus formation in vivo. We found, for the first time, that lower doses of GLA inhibits collagen- and thrombin-induced platelet activation and decreases thrombus formation without bleeding tendency.

## Materials and Methods

### Animals and human samples

All animal procedures were approved by the University Committee on Animal Care of Soochow University. Human venous blood was obtained from healthy donors in accordance with the Declaration of Helsinki and the permission from the University ethical committee of Soochow University. All participants gave written informed consent.

### Materials

Thrombin, ADP, HEPES and bovine serum albumin (BSA) were purchased from Sigma (St Louis, MO, USA). Collagen was purchased from Chrono-Log Corp (Havertown, PA, USA) and U46619 was from Calbiochem (Germany). Convulxin was purchased from Alexis Biochemicals (Alx-350-100-C050, USA) and CRP was synthesized in Peptide Institute (Osaka, Japan). Antibodies to Syk and phospho-Syk, LAT and phospho-LAT, and PLC $\gamma$ 2 and phospho-PLC $\gamma$ 2, were from Cell Signaling Technology (Beverly, MA, USA).

### Extraction and Isolation of GLA

Stems and leaves of *Rabdosia japonica* (Burm. f.) var. *glaucocalyx* (Maxim.) Hara were collected in Tieli of Heilongjiang Province in September 2009 and air-dried, and no permission is required to collect the stems and leaves of *Rabdosia japonica*. The identity of the plant material was verified by Prof. Zhenyue Wang, College of Pharmacy,

Heilongjiang University of Chinese Medicine, Haerbin, China. A voucher specimen (altitude 280.4m; N 46°986'; E128°688') is deposited in the Herbarium of Heilongjiang University of Chinese Medicine, Haerbin, China. As shown in Figure 1A, the dried and powdered stems and leaves (900g) were chopped and extracted with 80% EtOH two times under reflux and concentrated under vacuum to yield an EtOH extract. The extract (74.0g) was applied to column chromatography over a silica gel (200-300 mesh, 1200g) column eluted with a system of petroleum ether:ethyl acetate (pet.et:EtOAc) (8:1; 4:1; 2:1; 1:1) to obtain fractions A-D. GLA (0.09g) was obtained by recrystallization in EtOH from the fraction C (10.0g). GLB (0.009g) was from the fraction B (8.0g) and GLC (0.02g) was obtained by recrystallization in MeOH from the fraction D (42.0g).

The structure of GLA, GLB, and GLC were determined by spectroscopic analyses, including MS and 1D-NMR spectra. GLA: colorless square crystal (EtOH), APIMS m/z: 355.2 [M +Na]<sup>+</sup>. <sup>1</sup>H NMR (400MHz, DMSO-*d*<sub>6</sub>)  $\delta$ : 5.95 and 5.40 (each 1H, brs, 17-H<sub>ab</sub>), 4.71 (1H, brs, H-14 $\alpha$ ), 4.03 (1H, m, 7 $\beta$ -H), 2.95 (1H, brs, 13 $\alpha$ -H), 1.04 (3H, s), 1.00(3H, s), 0.98 (3H, s). <sup>13</sup>C NMR (100MHz, DMSO-*d*<sub>6</sub>)  $\delta$ : 37.9 (1-C), 33.9 (2-C), 216.5 (3-C), 46.5 (4-C), 50.6 (5-C), 30.9 (6-C), 73.0 (7-C), 60.7 (8-C), 52.8 (9-C), 38.6 (10-C), 18.1 (11-C), 30.3 (12-C), 46.1 (13-C), 74.6 (14-C), 207.0 (15-C), 148.8 (16-C), 116.9 (17-C), 27.4 (18-C), 21.1 (19-C), 18.1 (20-C). GLA was further analyzed by HPLC for its purity. GLA was dissolved in methanol at a concentration of 0.997 mg/ml and HPLC was performed on YMC C18 column (5 $\mu$ mol/L, 250  $\times$  4.6 mm ID) with a mobile phase consisting of methanol: water (60:40) at a flow rate 1 ml/min. Detection was by an Agilent 1260 Series HPLC with diode-array detector at 230 nm. HPLC analysis of isolated GLA confirmed its purity to 99% as shown in Figure 1B.

### Platelet isolation and aggregation

Human venous blood was obtained from healthy donors and anticoagulated 1:5 with ACD (65 mM Na<sub>3</sub> citrate, 70 mM citric acid, 100 mM dextrose, pH 4.4). Platelet-rich plasma (PRP) was obtained by centrifuging at 900 rpm for 20 minutes[18]. Gel-filtered platelets were prepared as described[19]. Briefly, The Sepharose™ 2B was packed in PBS in a column and PRP was applied to the column. Platelets were eluted using Tyrode's buffer to a series of 1.5 mL tubes. The collected platelets in each tubes were counted, combined, and adjusted to 2.5  $\times$  10<sup>8</sup>/mL using Tyrode's buffer for experiments. Platelets aggregation was performed in a ChronoLog aggregometer (Havertown, PA). Platelets were preincubated with vehicle or GLA for 10 min at 37°C in a cuvette. Before adding agonists, CaCl<sub>2</sub> (1mM) and fibrinogen (200 $\mu$ g/ml) were added. Aggregation assay was started with 0% aggregation baseline and then an agonist was added to observe the percentage of platelet aggregation with stirring at 900 rpm.

### Platelet viability assay

Gel-filtered platelets (2.5 $\times$ 10<sup>8</sup>/ml) were preincubated with GLA or vehicle and then incubated with Alamar Blue reagent (Invitrogen, Carlsbad, CA, USA) for 4 hours at 37°C. The fluorescence was acquired on a SpectraMax M Series

A

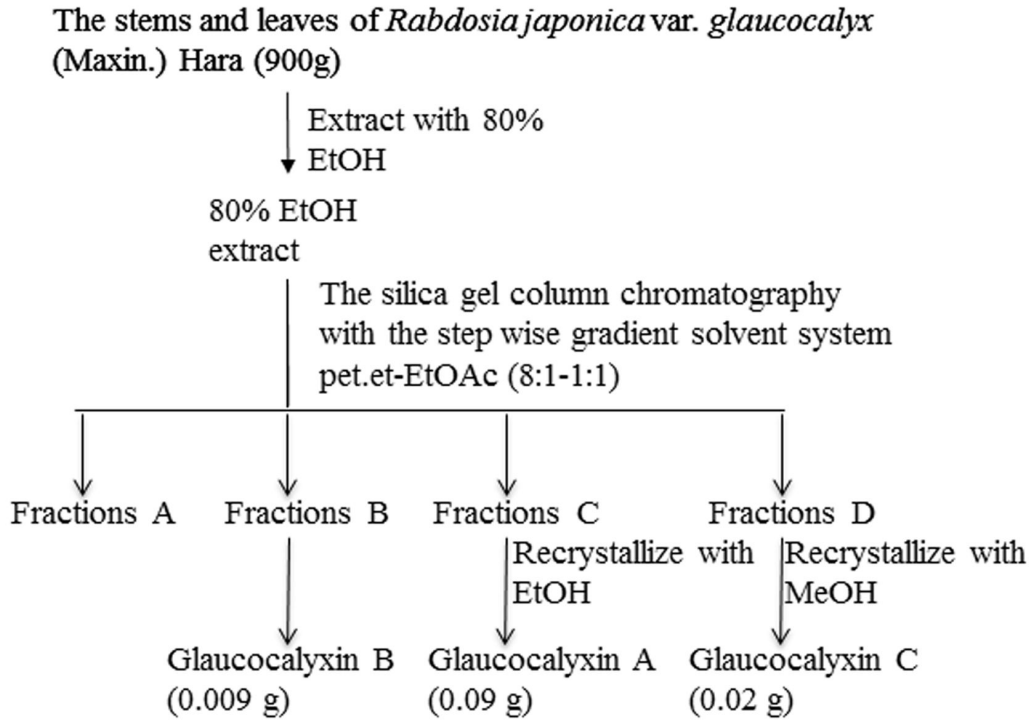

B

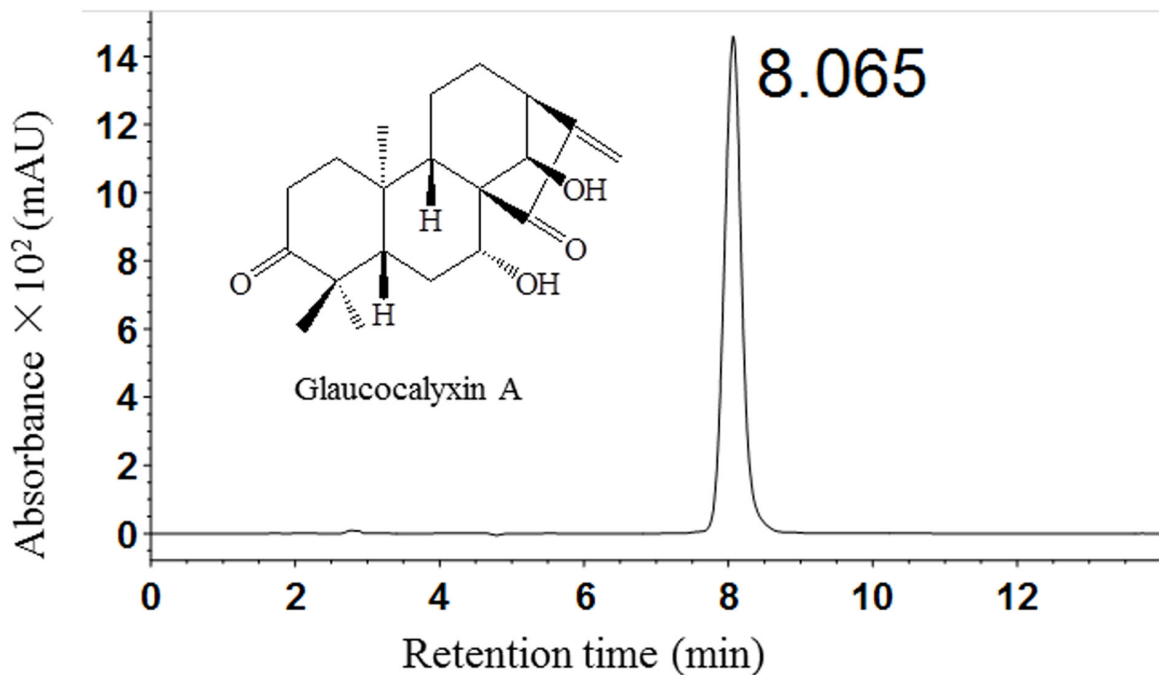

**Figure 1. Isolation and identification of Glaucocalyxin A.** *Rabdosia japonica* (Burm. f.) var. *glaucocalyx* (Maxim.) Hara were chopped and extracted, and the extract was applied to column chromatography. GLA, GLB, and GLC were obtained from the fraction C, fraction B, and fraction D, respectively (A). The isolated GLA was further confirmed by HPLC and its purity is 98% (B).

doi: 10.1371/journal.pone.0085120.g001

Microplate Reader (Molecular Devices, Sunnyvale, CA, USA). The excitation and emission wavelengths were 570 nm and 585 nm, respectively.

### PS Externalization Assay

As previously described[20], Gel-filtered platelets ( $2 \times 10^7$ /ml) were preincubated with GLA or dibucaine ( $500 \mu\text{mol/L}$ ) at room temperature for 15 min. Annexin V binding buffer ( $0.01\text{M}$  Hepes, pH 7.4,  $0.14\text{M}$  NaCl,  $2.5 \text{ mM}$   $\text{CaCl}_2$ ) was mixed with pre-treated platelets and annexin V-APC at a 50:50:1 ratio. Samples were gently mixed and incubated at room temperature for 15 min in the dark, then analyzed by flow cytometry.

### Immunoblotting

Platelets ( $2.5 \times 10^8$ /ml) pretreated with vehicle or GLA (0, 0.0025, 0.01, and  $0.1 \mu\text{g/ml}$ ) for 10 min were stimulated with agonists at  $37^\circ\text{C}$ . The reaction was stopped by the addition of sodium dodecylsulfate (SDS) sample buffer ( $62.5 \text{ mM}$  Tris-HCl, 2% SDS, 10% glycerol, 50 mM dithiothreitol, 0.1% bromophenol blue, pH 6.8) for dose response studies. For time course studies, platelets were pretreated with  $0.1 \mu\text{g/ml}$  of GLA and stimulated with agonists. The reaction was stopped at different time points. Samples were boiled for 5 min at  $95^\circ\text{C}$  and the proteins were separated on 10% SDS polyacrylamide gel electrophoresis (SDS-PAGE) gel. The proteins were then transferred to a nitrocellulose membrane and probed for Syk and phospho-Syk, LAT and phospho-LAT, and PLC $\gamma$ 2 and phospho-PLC $\gamma$ 2. After incubation with the goat anti-rabbit IRDye 800CW or goat anti-mouse IRDye 800CW (LI-COR Biosciences, Lincoln, NE, USA), densitometric band scanning was performed using an Odyssey Infrared Imaging System (LI-COR Biosciences).

### Platelet adhesion on collagen-coated surface under flow Conditions

The human whole blood was used for platelet adhesion assay under flow. The experiments were performed using BioFlux™ 200 setup (Fluxion Biosciences, USA) following manufacturer's instruction. Briefly, the channels were primed and coated with collagen I ( $200 \mu\text{g/ml}$ ) for 1 hour at room temperature and then blocked with PBS containing 0.5% BSA for 1 hour. The human whole blood was treated by GLA or vehicle and labeled with calcein-AM (Molecular Probes, Eugene, OR, USA) at a final concentration of  $10 \mu\text{mol/L}$  for 30 minutes at  $37^\circ\text{C}$ . Blood was perfused in the channels at  $1000 \text{ s}^{-1}$  and observed under fluorescent microscope for platelet adhesion and aggregates[21].

### Flow cytometry

Gel-filtered platelets were preincubated with GLA and then stimulated by convulxin or thrombin. Platelets were fixed with formaldehyde and stained with PE-conjugated mouse anti-human P-selectin antibody (eBioscience, San Diego, CA, USA) and FITC-conjugated PAC-1, respectively. Fluorescence-conjugated mouse IgG was used as isotype control (Santa

Cruz Biotechnology). Cells were analyzed using BD FACS Calibur Flow Cytometer (BD Biosciences, USA).

### FeCl<sub>3</sub>-induced carotid artery injury model

FeCl<sub>3</sub>-induced carotid artery injury was performed as previously described with some modifications[22,23]. Briefly, GLA ( $10 \text{ mg/kg}$ ) or vehicle was administered intraperitoneally to mice (C57BL/6, age 6-8 weeks), and after anesthesia using 7% chloral hydrate, the left carotid artery of mice was surgically exposed by blunt dissection. A  $1.0 \times 2.0$ -mm filter paper soaked in 7.5% FeCl<sub>3</sub> was applied to the surface of the adventitia of the exposed artery for two minutes. After removal of the filter paper, the artery was washed with PBS and an imaging ultrasound gel (MS400-0090; VisualSonics) was placed in the surgical wound to allow Doppler monitoring. The artery was identified using a small animal blood flow transducer (MS400, 18-38 MHz; VisualSonics) and the color Doppler mode of the VisualSonics Vevo model 2100 flowmeter. Time to occlusion of the carotid artery after the application of 7.5% FeCl<sub>3</sub> was measured using Visual Sonics View 2100. The operator was blinded to mice that infused either GLA or vehicle while performing all experiments.

### Tail bleeding time

Tail bleeding times were determined as previously described[22]. Briefly, GLA or vehicle was administered intraperitoneally to male mice (C57BL/6, age 6-8 weeks). After 45min, mice were anesthetized with pentobarbital ( $100 \text{ mg/kg}$ , i.p.) and placed prone on a heating pad from which the tail protruded. The distal 5 mm of the tail was transected and immediately immersed in 12 ml 0.9% sodium chloride for 10 min at  $37^\circ\text{C}$ , and the time to bleeding cessation was recorded.

### Statistical analysis

Data were analyzed by using GraphPad Prism 5.0 software and presented as means  $\pm$  standard error of the mean. The statistical significance was determined by one-way ANOVA analysis of variance with the Bonferroni post test for multiple groups. The Student t test was used to calculate P values for differences. Differences were considered significant at  $P < 0.05$ .

## Results

### GLA selectively inhibits platelet aggregation induced by collagen and CRP

To investigate the effect of GLA on platelet activation, we performed platelet aggregation induced by a panel of agonists. Gel-filtered human platelets were incubated with GLA ( $0.0025$ - $0.1 \mu\text{g/ml}$ ) or solvent alone for 10 min at  $37^\circ\text{C}$  and then stimulated with collagen ( $2 \mu\text{g/ml}$ ), ADP ( $10 \mu\text{mol/L}$ ), U46619 ( $1 \mu\text{mol/L}$ ), or thrombin ( $0.1 \text{ IU/ml}$ ). Results showed that GLA ( $0.01 \mu\text{g/ml}$ ,  $0.1 \mu\text{g/ml}$ ) significantly inhibited platelet aggregation induced by collagen ( $P < 0.001$ ) (Figure 2A&2B) with IC<sub>50</sub> of  $0.00725 \mu\text{g/ml}$  and CRP, a GPVI selective agonist ( $P < 0.01$ ) (Figure 2C&2D) with IC<sub>50</sub> of  $0.00062 \mu\text{g/ml}$  compared with vehicle-treated platelets. However, none of the concentrations of GLA significantly inhibits platelet aggregation induced by

other agonists (Figure 2E-2G), implying a selective effect of GLA on the GPVI signaling pathway. Interestingly, GLA seemed more efficient in inhibiting CRP-induced platelet aggregation as the inhibitory concentration was as low as 0.0025 $\mu$ g/ml. Therefore, our data suggested that relatively lower doses of GLA selectively inhibits platelet aggregation via GPVI signaling pathway. Additionally, when we examined the effect of GLA on the low-dose thrombin (0.01, 0.03, and 0.05U/ml)-induced platelet aggregation, we found that GLA significantly inhibited platelet aggregation induced by 0.03U/ml thrombin ( $P < 0.01$ ) (Figure 2H&2I), but not 0.05U/ml thrombin (data not shown), implying a potentially additional target of GLA in platelet activation.

Using the effective inhibition dose of GLA (0.01 $\mu$ g/ml), we tested whether GLA inhibits platelet aggregation induced by higher doses of collagen. Results showed that the GLA (0.01 $\mu$ g/ml) inhibits collagen-induced platelet aggregation within the concentrations of 1- 5 $\mu$ g/ml (Figure 3A-3D). We also measured the inhibition of GLA on different concentrations of CRP-induced platelet activation. We showed that GLA (0.01 $\mu$ g/ml) inhibited CRP-induced platelet aggregation within the concentrations of 0.1- 0.2 $\mu$ g/ml (Figure 3E-3G).

#### GLA Did Not Induce the Toxic or Apoptotic Effects of Platelets

To examine whether the inhibition effect of GLA on agonist-induced platelet aggregation is due to its potential toxic or apoptotic effect, we performed Alamar Blue staining and platelet PS exposure assay. Results showed that treatment of platelets with GLA (0, 0.0025, 0.01, 0.1, 1.0, 10 $\mu$ g/ml) for 15min at 37°C did not cause any significant toxic or apoptotic effect on platelets, confirming the inhibitory effect of GLA on platelet aggregation (Figure 4A&4B).

#### GLA inhibits tyrosine phosphorylation of Syk, LAT, and PLC $\gamma$ 2 in the GPVI signaling pathway

Given the fact that lower concentration of GLA inhibits platelet aggregation induced by collagen and CRP, we next examined the effect of GLA on collagen-stimulated signal transduction downstream of GPVI signaling pathway. Activation of GPVI collagen receptor results in tyrosine phosphorylation of the associated receptor-complex protein, the FcR  $\gamma$ -chain mediated by the Src-family kinases Fyn and Lyn. This leads to the recruitment and activation of the cytosolic tyrosine kinase Syk. The effect of GLA on the level of tyrosine phosphorylation of Syk following stimulation with collagen was therefore examined. Results showed that GLA decreased the level of collagen-stimulated tyrosine phosphorylation of the Syk in a concentration-dependent manner (Figure 5A). Activation of Syk following its association with the activated receptor complex including LAT results in tyrosine phosphorylation and recruitment of phospholipase  $\text{C}\gamma$ 2 (PLC $\gamma$ 2) [24]. We therefore also investigated the effect of GLA on collagen-stimulated tyrosine phosphorylation of LAT and PLC $\gamma$ 2. Results showed that the levels of tyrosine phosphorylation of LAT and PLC $\gamma$ 2 were also inhibited in a concentration-dependent manner by GLA (Figure 5B & 5C). Time course studies showed that inhibition of GLA on collagen-induced tyrosine phosphorylation

of Syk, LAT, and PLC $\gamma$ 2 occurred at 1-2min of platelet activation (Figure 5D). On the contrary, GLA did not inhibit thrombin (0.1U/ml)-induced tyrosine phosphorylation of Syk, LAT, and PLC $\gamma$ 2 (Figure 5E).

#### GLA inhibits platelet granule secretion and inside-out activation of the integrin $\alpha$ IIb $\beta$ 3

As the activation of GPVI and its interaction with the downstream molecules leads to platelet P-selectin activation and the inside-out signaling of the integrin  $\alpha$ IIb $\beta$ 3, we examined the influence of GLA on those events. Human platelets were pre-incubated with GLA (0.5 $\mu$ g/ml) in the presence of fluorescent PE-conjugated P-selectin antibody and then challenged with convulxin (0.2nM), a selective glycoprotein VI ligand, for 20 minutes. P-selectin expression of platelets was monitored by flow cytometry. As shown in Figure 6A, convulxin increased P-selectin expression, but the increase was reduced in the presence of GLA ( $p < 0.01$ ). However, we did not find any inhibition of platelet granule secretion when thrombin was used to stimulate platelets (Figure 6B). To test whether GLA inhibits platelet inside-out signaling of the integrin  $\alpha$ IIb $\beta$ 3, PAC-1 was used as it recognizes an epitope on the integrin  $\alpha$ IIb $\beta$ 3 complex of activated platelets at or near the platelet fibrinogen receptor[24]. Similarly, human platelets were pre-incubated with GLA (0.5 $\mu$ g/ml) in the presence of FITC-conjugated PAC-1 and then challenged with convulxin (0.2nM) for 20 minutes. PAC-1 binding of single platelet was monitored by flow cytometry. As shown in Figure 6C, convulxin increased platelet PAC-1 binding and the increase was reduced in the presence of GLA ( $p < 0.01$ ). Again, we did not find any inhibition of platelet granule secretion when thrombin was used to stimulate platelets (Figure 6D).

Since we found GLA inhibits low-dose thrombin-induced platelet aggregation, we further titrated the thrombin concentrations that were inhibited by GLA for its ability to induce platelet aggregation using flow cytometric analysis of platelet granule secretion and integrin activation. As shown in Figure 6E and 6F, GLA only significantly inhibited 0.03U/ml thrombin-induced P-selectin secretion ( $P < 0.05$ ) consistent to the aggregation assay (Figure 2H&2I). However, GLA was found to significantly inhibit all three concentrations of thrombin (0.01, 0.03, and 0.05U/ml)-induced integrin activation tested ( $P < 0.01$ ,  $P < 0.01$ , and  $P < 0.05$ , respectively).

#### Effects of GLA on platelet function *ex vivo*

Functional GPVI plays an important role in platelet adhesion to collagen. We next examined the effect of GLP on platelet adhesion on collagen-coated surface under flow using a microfluidics flow chamber. We perfused anticoagulated blood that has been labeled by calcein-AM and preincubated with GLA over a collagen-coated surface in the microfluidics flow chamber (1000s<sup>-1</sup>)[25] for 10min. We observed that an initial monolayer of platelets adhered to the collagen, after which additional platelets accumulated on those that arrived first, forming platelet aggregates. The fluorescence intensity from platelets on the collagen surface was calculated. Data analysis showed that the extent of platelet accumulation were reduced by over 60% in the presence of 0.1 $\mu$ g/ml of GLA ( $P < 0.05$ ) and

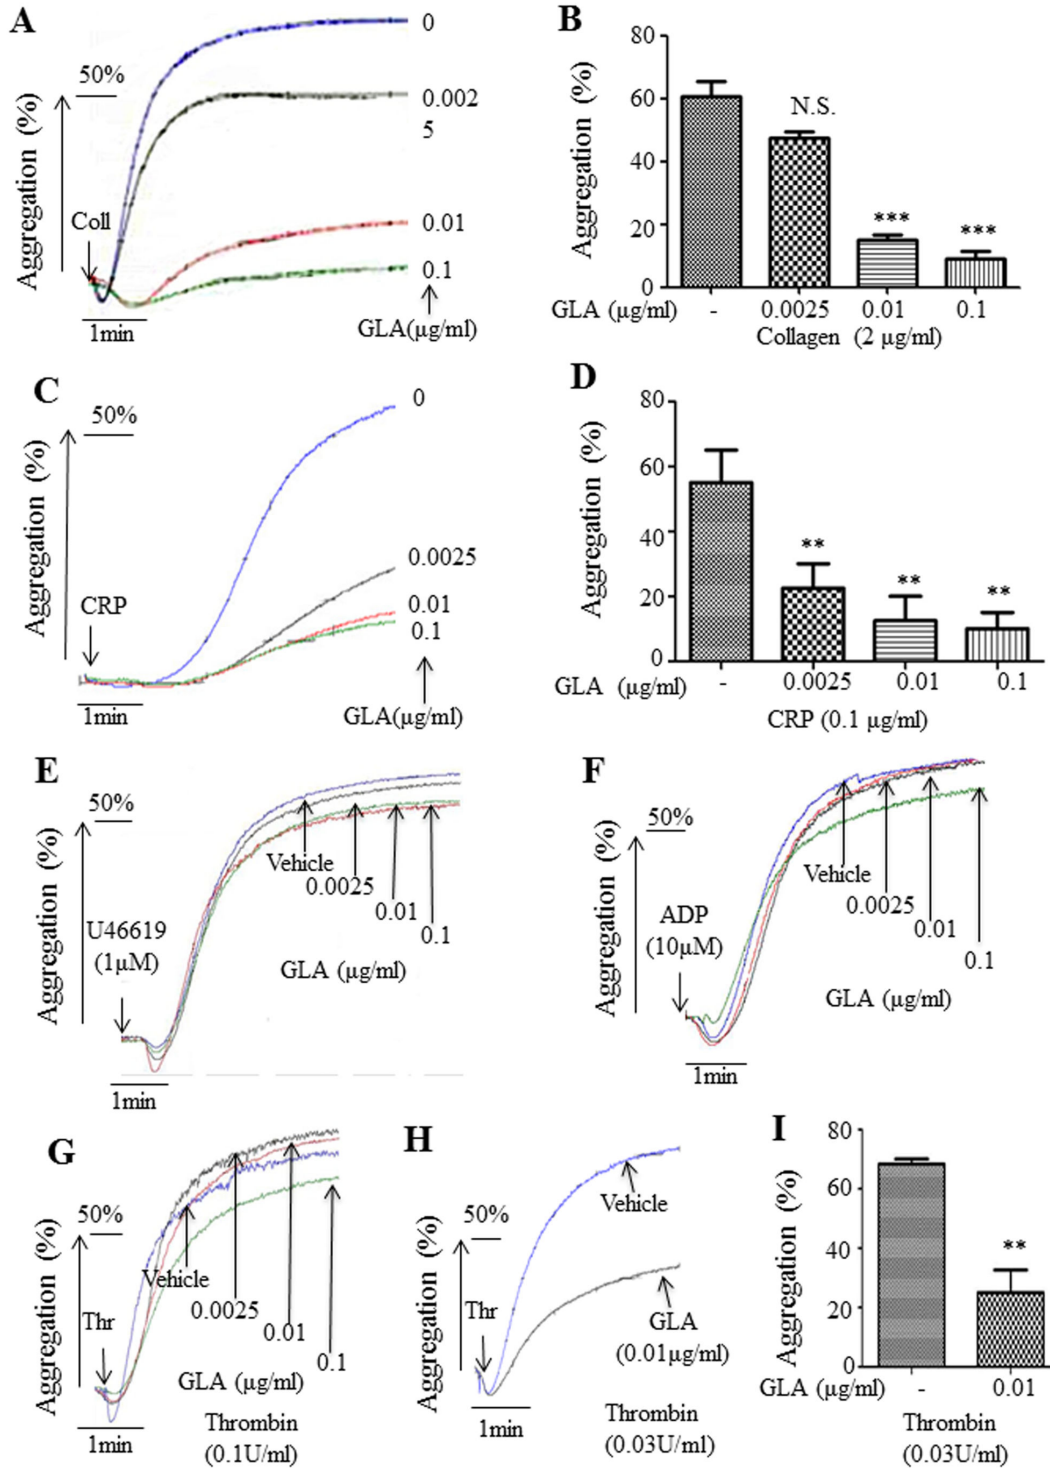

**Figure 2. Effects of GLA on agonist-induced platelet aggregation.** Gel-filtered platelets ( $2.5 \times 10^9$ /ml) were pre-incubated for 10 min with different concentrations of GLA (0.0025, 0.01, and 0.1 μg/ml) or vehicle (DMSO). Platelet aggregation was initiated with collagen (2 μg/ml) (A), CRP (0.1 μg/ml) (C), U46619 (1 μmol/L) (E), ADP (10 μmol/L) (F), and thrombin of both a high dose (0.1 U/ml) (G) and a low dose (0.03 U/ml) (H). Maximum extent of platelet aggregation from three individual experiments was plotted in the bar charts (mean ± standard error, n=3). The statistical significance was determined by one-way ANOVA analysis of variance with the Bonferroni post test (B, D, and I). \*\*P<0.01. \*\*\*P<0.001. N.S., not significant compared to vehicle control. E, F, and G are representatives of at least three individual experiments.

doi: 10.1371/journal.pone.0085120.g002

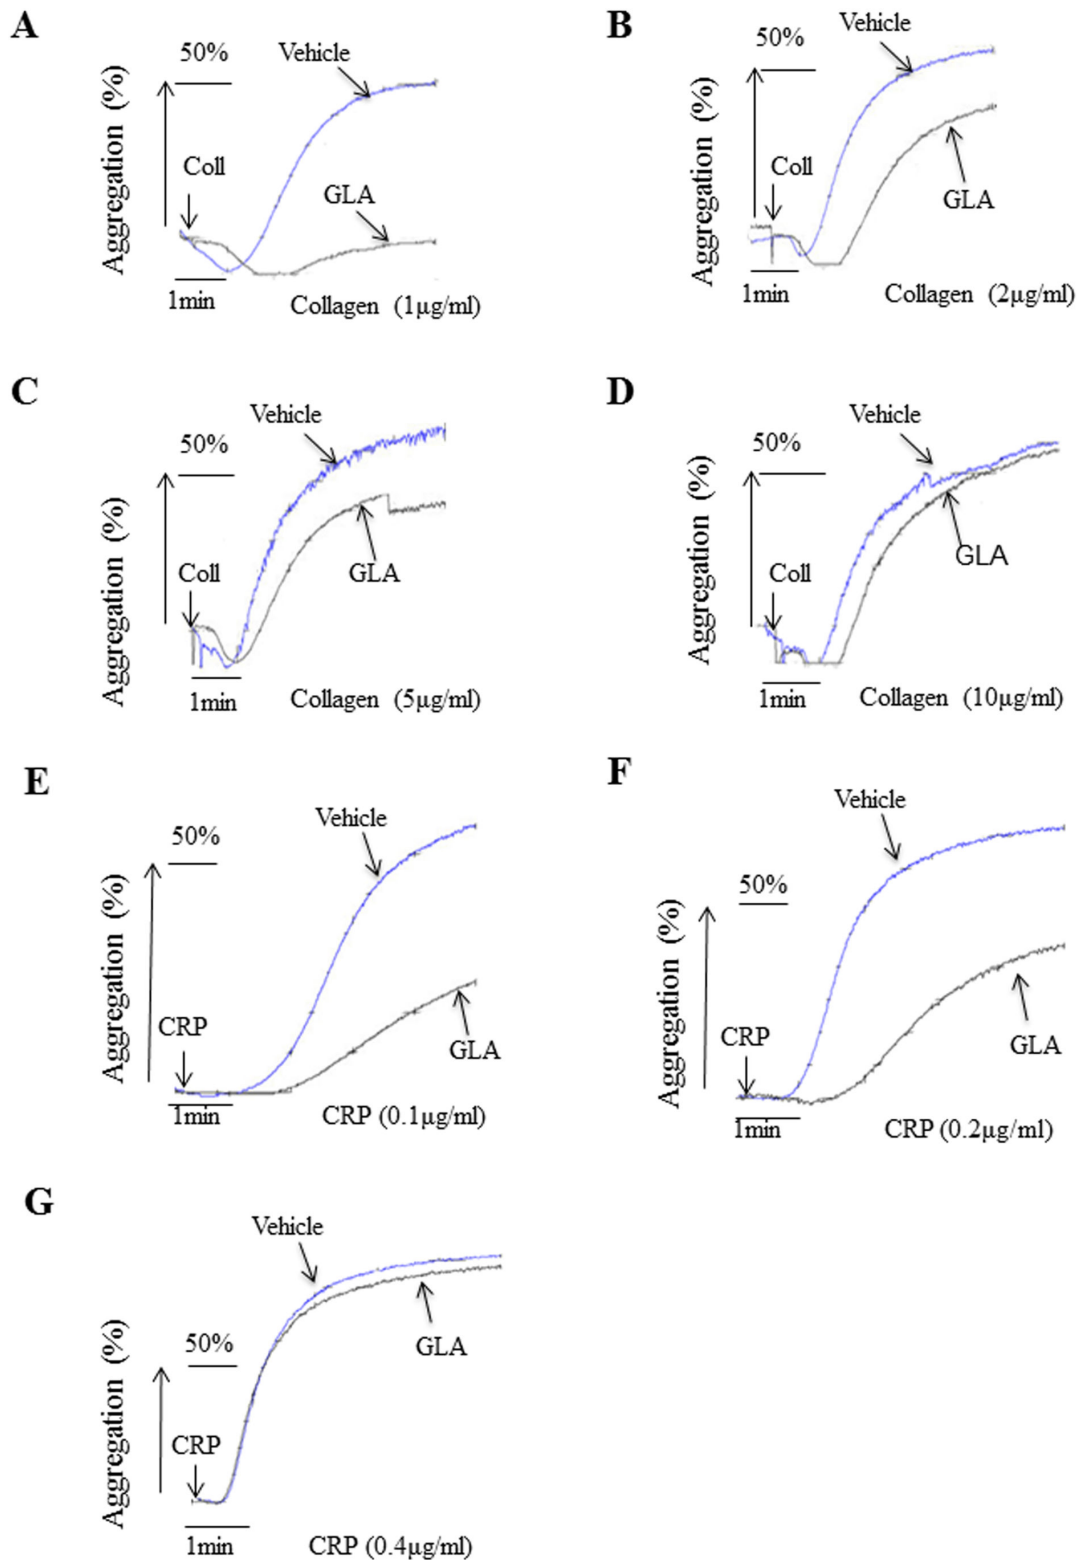

**Figure 3. Effects of GLA on platelet aggregation induced by different concentration of collagen and CRP.** Gel-filtered platelets ( $2.5 \times 10^8/\text{ml}$ ) were pre-incubated for 10 min with GLA ( $0.01 \mu\text{g}/\text{mL}$ ) or vehicle (DMSO). Platelet aggregation was initiated with  $1 \mu\text{g}/\text{ml}$  (A),  $2 \mu\text{g}/\text{ml}$  (B),  $5 \mu\text{g}/\text{ml}$  (C), and  $10 \mu\text{g}/\text{ml}$  (D) of collagen, and  $0.1 \mu\text{g}/\text{ml}$  (E),  $0.2 \mu\text{g}/\text{ml}$  (F), and  $0.4 \mu\text{g}/\text{ml}$  of CRP (G). The aggregation curves are the representatives of at least three individual experiments.

doi: 10.1371/journal.pone.0085120.g003



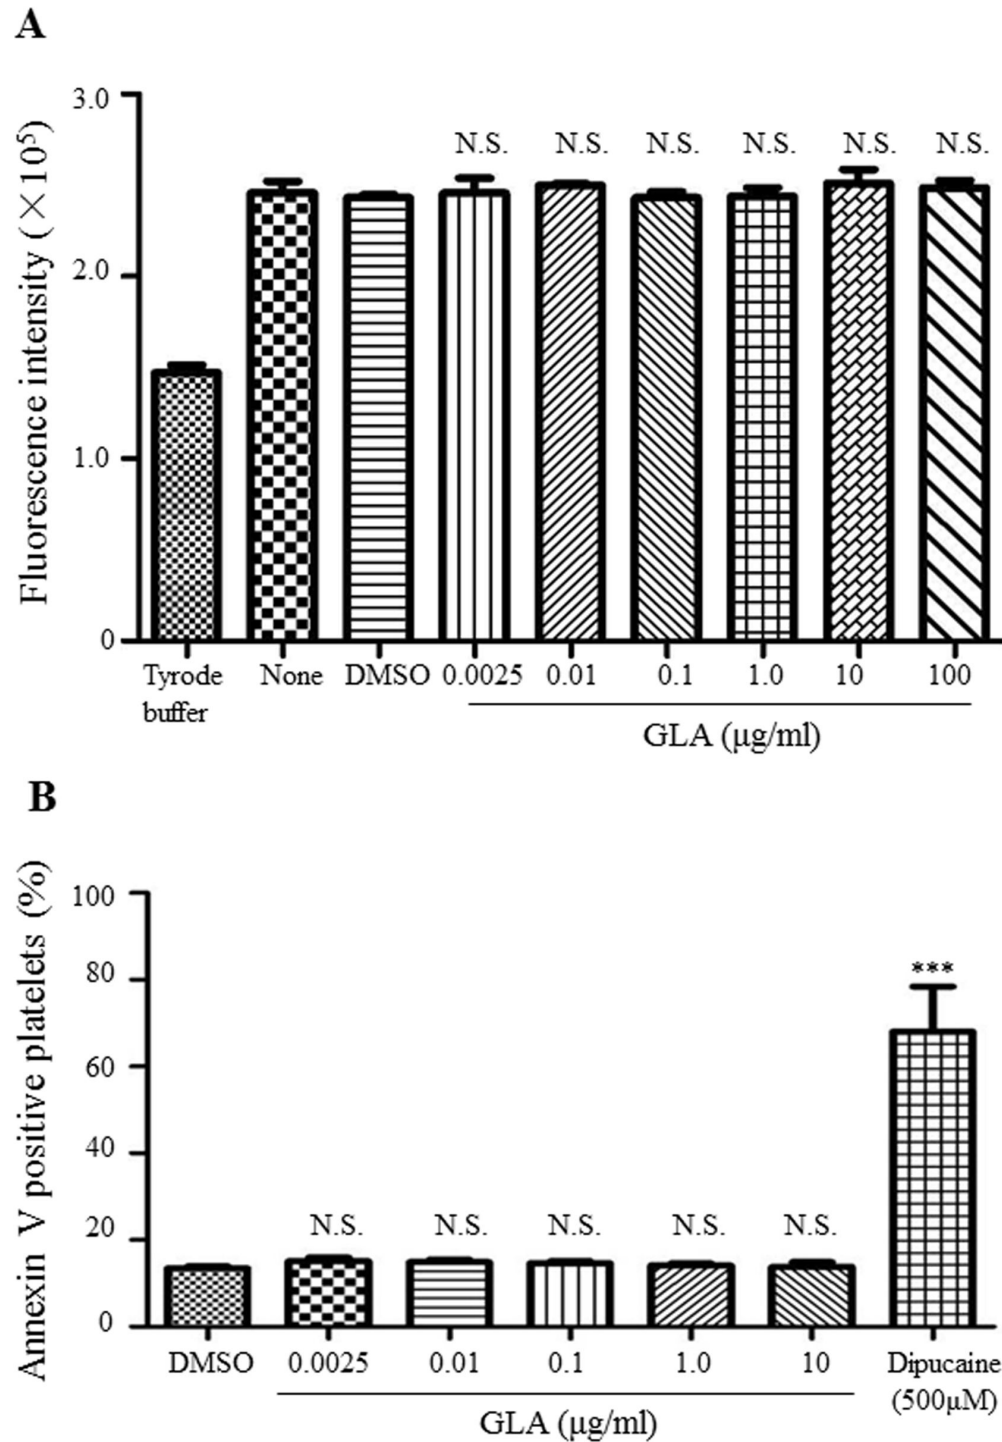

**Figure 4. Evaluation of the potential toxic and apoptotic effect of GLA on platelets.** (A) In platelet viability assay for the toxic effect of GLA, gel-filtered platelets ( $2.5 \times 10^9/\text{ml}$ ) were preincubated with GLA (0.0025–100 µg/ml) or vehicle and then incubated with Alamar Blue reagent for 4 hours at 37°C. The fluorescence was acquired with the excitation and emission wavelengths of 570 nm and 585 nm, respectively, and plotted in the bar charts (mean  $\pm$  standard error,  $n=3$ ). (B) In PS externalization assay, gel-filtered platelets ( $2 \times 10^7/\text{ml}$ ) were preincubated with GLA (0.0025–10 µg/ml) or vehicle or dibucaine (500 µmol/L) at 37°C for 15 min, and then mixed with Annexin V binding buffer and Annexin V-APC. Samples were analyzed by flow cytometry and the percentage of annexin V positive platelets was calculated (mean  $\pm$  standard error,  $n=3$ ). \*\*\* $P < 0.001$ . N.S., not significant compared to vehicle control. The statistical significance was determined by one-way ANOVA analysis of variance with the Bonferroni post test.

doi: 10.1371/journal.pone.0085120.g004



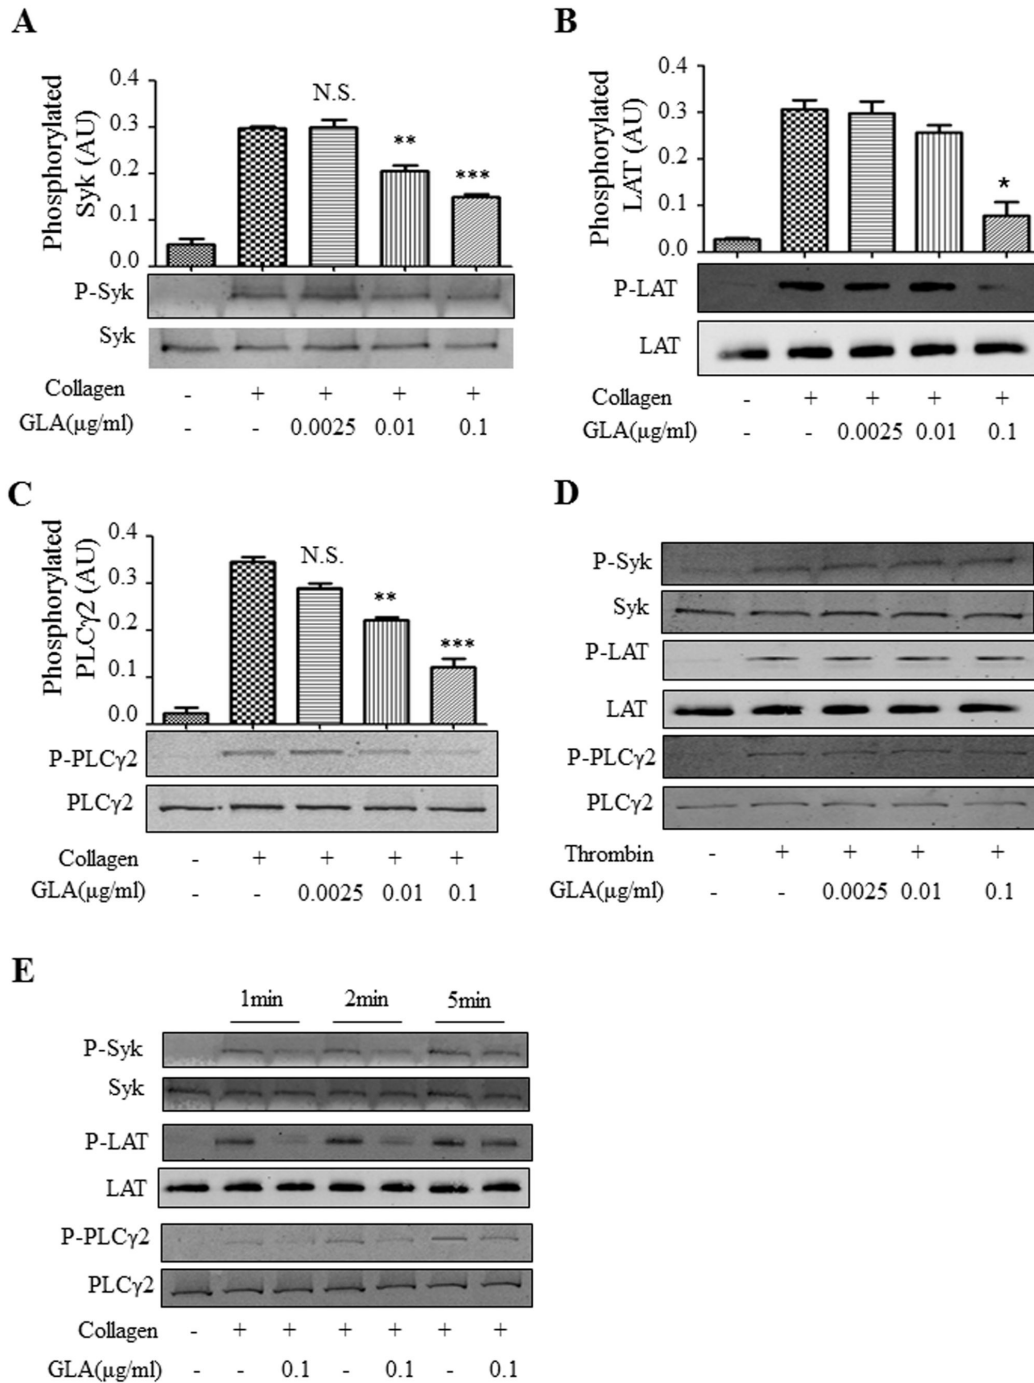

**Figure 5. Influences of GLA on platelet intracellular signaling.** Gel-filtered platelets ( $2.5 \times 10^8/\text{ml}$ ) were pre-incubated with vehicle (DMSO) or GLA (0.0025, 0.01, 0.1  $\mu\text{g/ml}$ ), and stimulated with collagen (2  $\mu\text{g/ml}$ ) with stirring at 900 rpm in an aggregometer at 37°C for 60 seconds. Platelets were lysed, and immunoblotted using the corresponding antibodies recognizing total and phosphorylated Syk (A), total and phosphorylated LAT (B), and total and phosphorylated PLC $\gamma$ 2 (C). After incubation with the goat anti-rabbit IRDye 800CW or goat anti-mouse IRDye 800CW (LI-COR Biosciences, Lincoln, NE, USA), densitometric band scanning was performed using an Odyssey Infrared Imaging System (LI-COR Biosciences) (mean  $\pm$  standard error,  $n=3$ ). \*\* $P < 0.01$ . \*\*\* $P < 0.001$ . N.S., not significant compared to vehicle control. The statistical significance was determined by one-way ANOVA analysis of variance with the Bonferroni post test. Same methods were used to measure the time course of GLA inhibition (D) and thrombin control (E) for the phosphorylation of the three signaling molecules in the GPVI pathway. The gels are the representatives of at least three individual experiments.

doi: 10.1371/journal.pone.0085120.g005

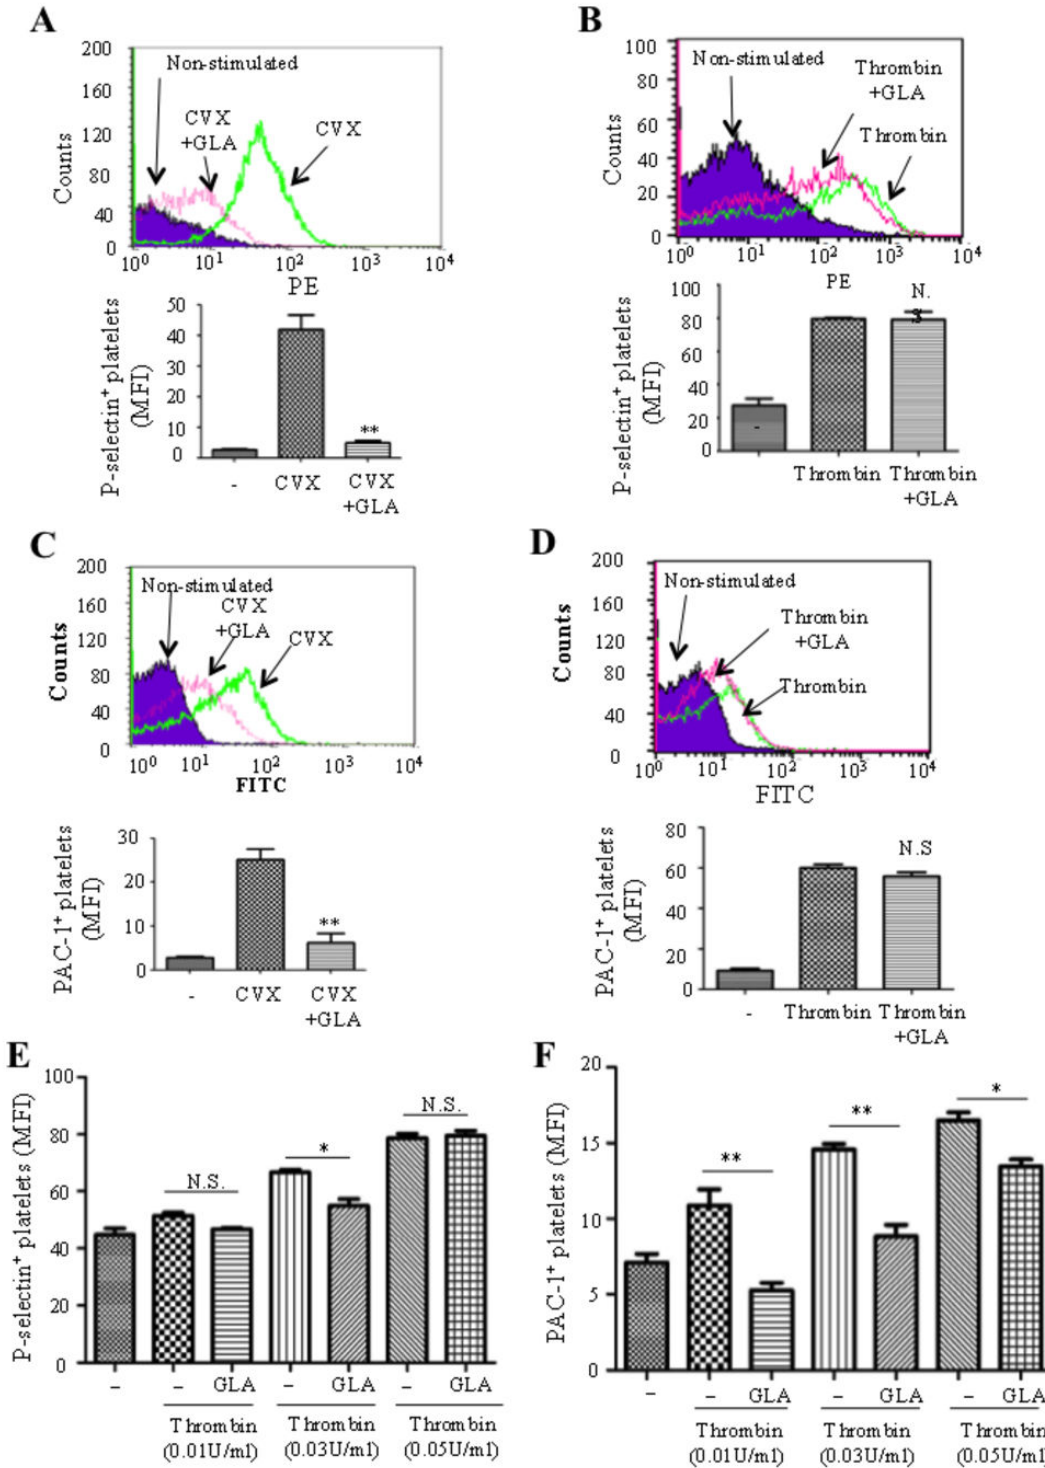

**Figure 6. Effects of GLA on single-platelet activation.** Gel-filtered platelets ( $2.5 \times 10^9/\text{ml}$ ) were pre-incubated with vehicle (DMSO) or GLA ( $0.5 \mu\text{g}/\text{ml}$ ) for 10 min in the presence of PE-conjugated P-selectin antibody or FITC-conjugated PAC-1. Samples were then challenged with CVX ( $0.2\text{nM}$ ) (A, C) or thrombin ( $0.1\text{U}/\text{ml}$ ) (B, D) and incubated for 10 min. P-selectin expression (A, B) and PAC-1 binding (C, D) were monitored by flow cytometry. Similarly, using the effective inhibitory dose of GLA ( $0.01\mu\text{g}/\text{ml}$ ), P-selectin secretion (E) and integrin activation (F) induced by lower doses of thrombin were tested. Data plotted are means  $\pm$  standard errors of three individual experiments. \* $P < 0.05$ . \*\* $P < 0.01$ . N.S., not significant compared to vehicle control. The statistical significance was determined by one-way ANOVA analysis of variance with the Bonferroni post test.

doi: 10.1371/journal.pone.0085120.g006

almost completely wiped out in the presence of 0.5 $\mu$ g/ml GLA ( $P < 0.001$ ) at 10min after perfusion, indicating that GLA attenuates platelet adhesion and aggregation on collagen surface (Figure 7A-7D).

### GLA inhibited thrombus formation in vivo, but did not cause bleeding tendency in low dose GLA-treated animals

To study the effect of GLA on thrombus formation in vivo, FeCl<sub>3</sub>-induced carotid artery injury mouse model was performed and the time to FeCl<sub>3</sub>-induced carotid artery occlusion was measured. Mice were randomly grouped into two groups and injected with either GLA (10 mg/kg) or solvent as a vehicle control at a single bolus via i.p. injection. Although there was overlap in some of the individual results, the average time to occlusion increased by 30.3%, from 4.6  $\pm$  0.25min in the vehicles (n=16) to 6.6  $\pm$  0.52min in the GLA group (n=14) (mean  $\pm$  error.  $P < 0.001$ ) (Figure 8A). To evaluate the bleeding risk of using GLA, the effect of GLA administration on the tail bleeding time was examined. Mice were randomly grouped into 6 groups (10 mice in each group) and GLA (vehicle, 0.1, 1.0, 5.0, 10, 15 mg/kg) was administered for each group. Forty-five minutes after GLA administration, the first bleeding time of tail snip was recorded. Results showed that administration of lower doses of GLA (0.1, 1.0, 5.0, 10 mg/kg) did not extend bleeding time as compared to the vehicle group. However, higher dose of GLA (15 mg/kg) caused a significant extension of bleeding time compared to the vehicle control ( $P > 0.05$ ). Therefore, our data clearly indicate that GLA has no bleeding risk at the dose (<10mg/kg) that we used to inhibit thrombus formation in carotid artery injury model (Figure 8B), but attention for the bleeding risk has to be given when a higher dose of GLA is used.

## Discussion

To identify potential compounds from natural products that have antiplatelet and antithrombotic effect without bleeding tendency as our systemic drug discovery project, we have recently isolated and purified *ent*-kauranoid diterpenoids, glaucocalyxin (GLA), glaucocalyxin B (GLB), and glaucocalyxin C (GLC) from *Rabdosia japonica* var. *galaucocalyx*. Both GLA and GLB have a  $\alpha\beta$ -unsaturated ketone at C-15, C-16, and C-17, while GLC has a  $\alpha$ -orientated hydroxyl group at C-15 and a methylene group at C-16 and C-17. The structural difference between GLA and GLB is that the hydroxyl group at C-14 of GLA has been acetylated in GLB. Since all three diterpenoid compounds inhibit platelet aggregation (data not shown), we focused on GLA in this study and investigated its effect on platelet activation and thrombus formation as well as the underlying molecular mechanism. We found that GLA inhibits platelet aggregation in response to collagen through the inhibition of GPVI-mediated signaling in vitro in a concentration-dependent manner. It also inhibited platelet activation induced by low dose of thrombin. Platelet secretion, integrin activation, and platelet adhesion on a collagen surface were also inhibited by GLA. In vivo studies showed that GLA

decreases the thrombus formation without bleeding tendency in relatively low concentrations.

Previous reports[16,17] showed that GLA (1-100 $\mu$ mol/L) inhibits rabbit platelet aggregation induced by ADP, AA, and PAF. Consistently, preincubation of human platelets with relatively higher concentrations of GLA (5-50  $\mu$ g/ml) significantly inhibited platelet aggregation in response to most of the platelet agonists including collagen, thrombin, ADP, and U46619 (data not shown). However, the inhibitory effect of GLA on collagen-stimulated platelet aggregation was notably potent in comparison with other agonists as the inhibition even occurs at as low as 0.01 $\mu$ g/ml (0.03 $\mu$ mol/L) of GLA, at which other agonist-induced platelet aggregation was not inhibited. The effect of high dose of GLA on platelet aggregation could potentially be due to the effect of GLA on multiple molecules in platelets as GLA was shown to inhibit the PAF biosynthesis, decrease TXA level, and increase the levels of PGE<sub>2</sub> and cAMP in high doses[16,17,26]. It could be possible that high dose of GLA may induce the toxicity and the apoptosis of platelets. However, the viability assay and PS externalization assay excluded this possibility (Figure 4).

The selective inhibitory effect of low dose GLA on collagen-induced platelet aggregation led us to ask whether GLA inhibits platelet aggregation via GPVI pathway. Platelets are known to have two major receptors for collagen, the integrin  $\alpha 2\beta 1$  and the glycoprotein VI/FcR $\gamma$ -chain complex (GPVI), as well as a number of minor receptors of uncertain significance[27]. We used collagen-related peptide (CRP), a GPVI specific agonist, to define the characteristics of the GPVI-mediated platelet activation. As expected, our results showed that GLA inhibits CRP-induced platelet aggregation in a dose-dependent manner, confirming that GLA inhibits platelet activation via GPVI signaling pathway. However, GLA may affect platelet activation through GPCR as well because GLA inhibits platelet aggregation induced by lower dose of thrombin (0.03U/ml) although GLA does not inhibit high dose thrombin (0.1 U/ml)-induced platelet aggregation. How GLA affects low dose thrombin-induced platelet activation and what is the integral effect of GLA on both GPVI pathway and GPCR need to be further studied.

To study the molecular mechanism and the consequence of GLA on platelet activation in vitro and ex vivo, we examined the effect of GLA on the downstream signaling of GPVI pathway, platelet secretion, the inside-out activation of integrin  $\alpha IIb\beta 3$ , and platelet adhesion on collagen-coated surface. As expected, incubation of GLA reduced collagen-induced phosphorylation of three major molecules, Syk, LAT, and PLC $\gamma 2$  in GPVI signaling pathway. However, the exact target(s) of GLA in platelets is unknown. The influence of GLA on single platelet activation was further investigated by two separate assays and we showed that GLA inhibits p-selectin expression and  $\alpha IIb\beta 3$  activation induced by collagen and lower doses of thrombin. Microfluidic chamber assay is a recently developed design to study platelet adhesion on the coated surface under flow condition[25]. GLA-treated platelets showed less accumulation than the untreated platelets in a dose-dependent manner.

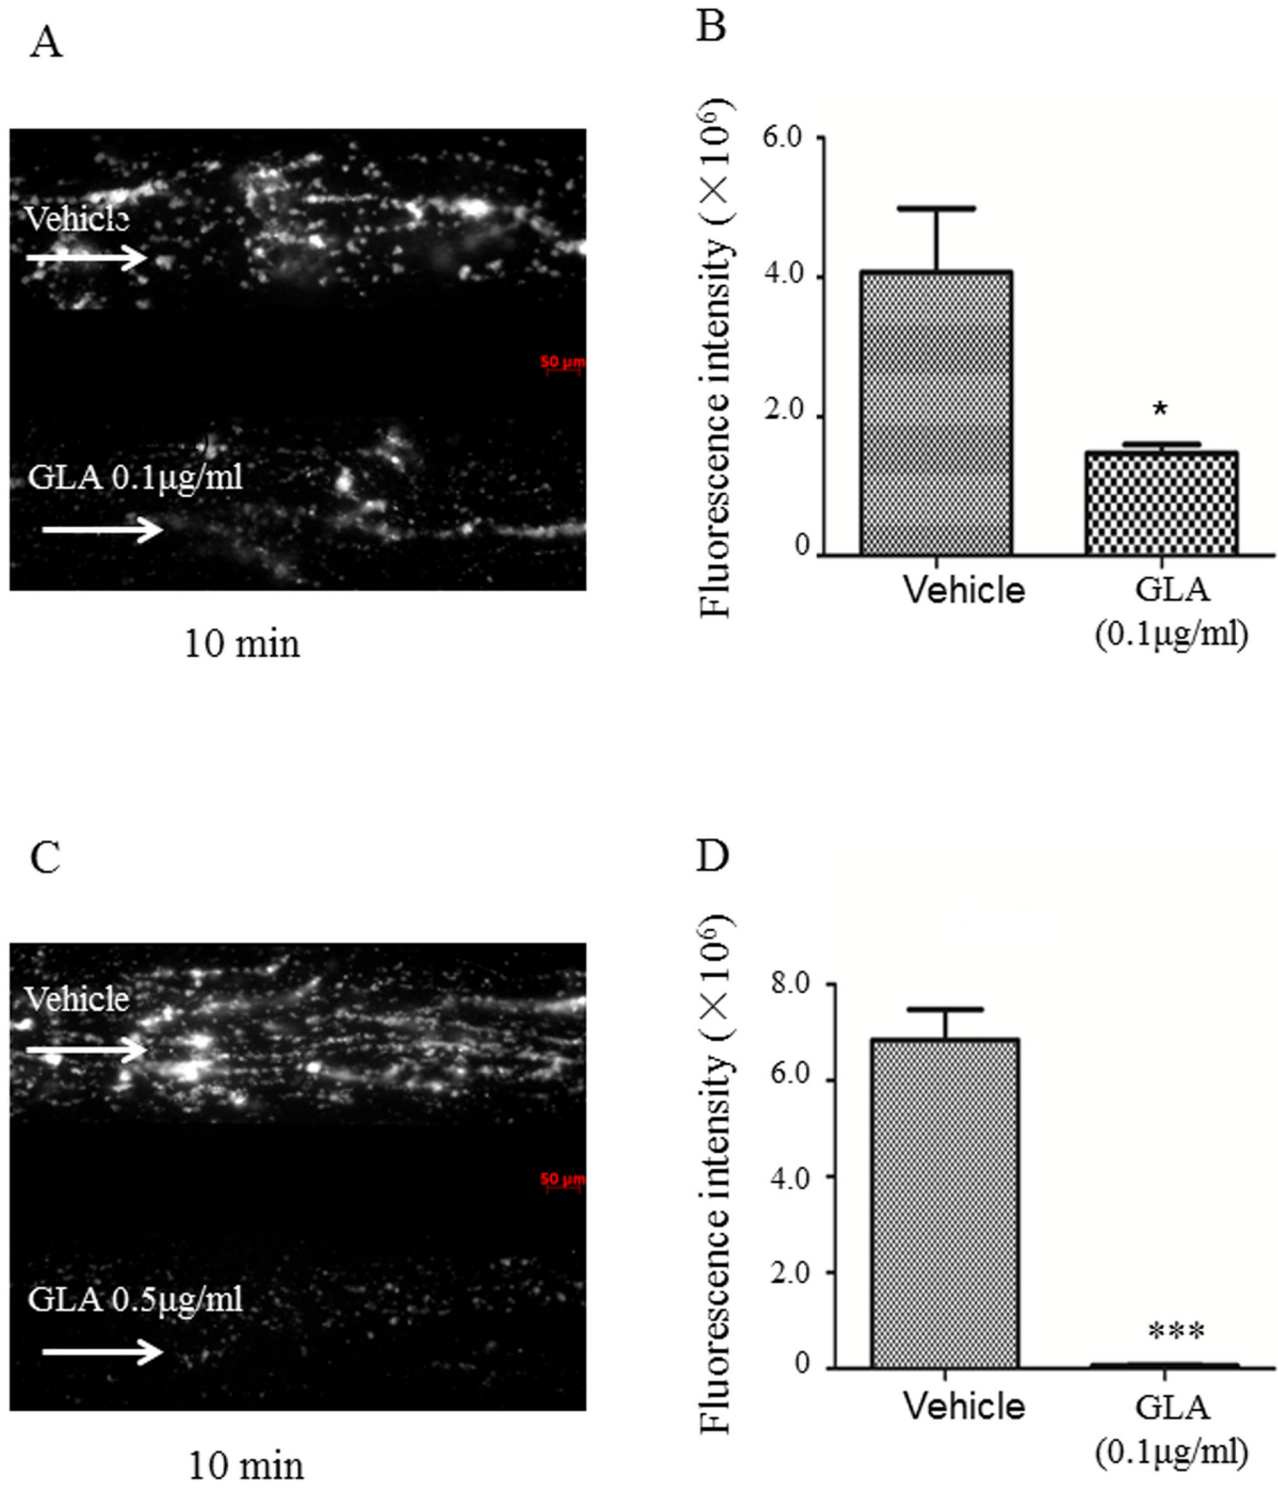

**Figure 7. Effects of GLA on platelet adhesion on collagen-coated surfaces.** Human whole blood was labeled with Calcein-AM, treated with (lower channels) or without (upper channels) 0.1 µg/ml (A) or 0.5 µg/ml (B) of GLA, and perfused over collagen-coated surface for 30 min at a shear rate of 40 dyn/cm<sup>2</sup> (1000s<sup>-1</sup>). Platelet adhesion and aggregates were observed under a fluorescence microscope. Photos were taken at 10 min (A) after flow. Arrow indicates the flow direction. Data plotted are means ± standard errors of fluorescence intensity of three individual experiments (\*P < 0.05, \*\*\*P < 0.01). The Student t test was used to calculate P values for differences.

doi: 10.1371/journal.pone.0085120.g007

A

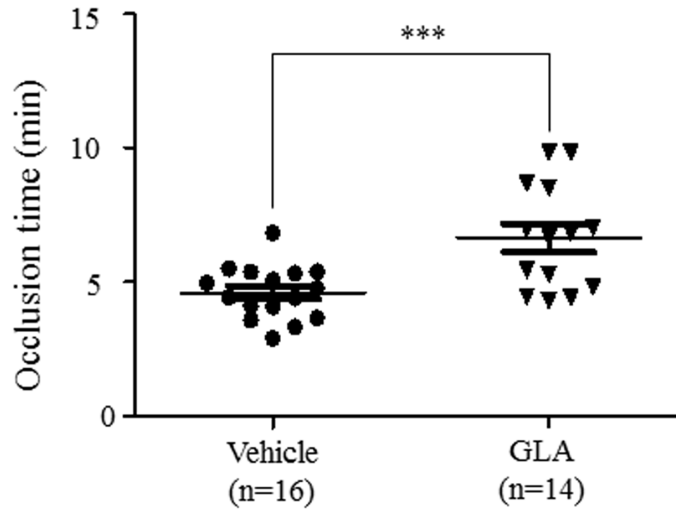

B

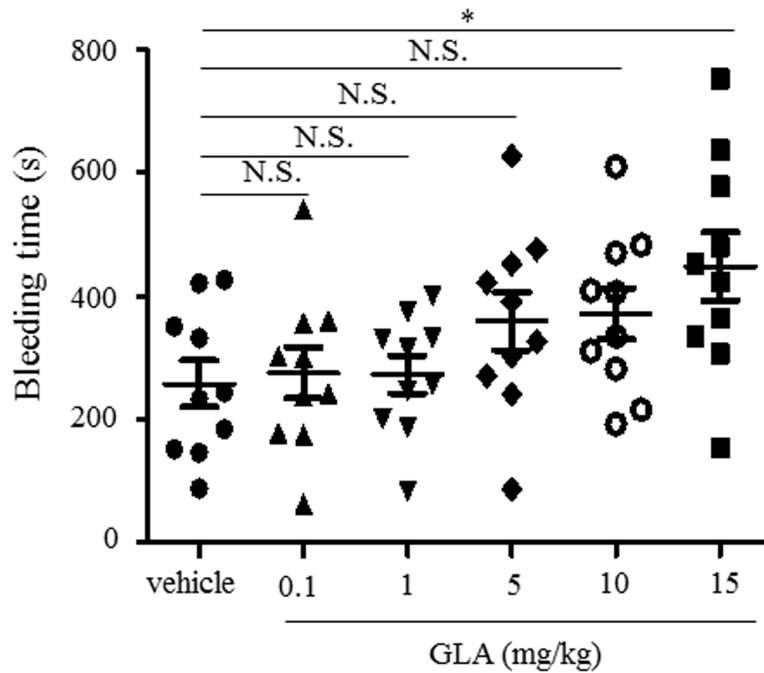

**Figure 8. GLA inhibits thrombus formation in vivo, but did not extend the tail bleeding time in mice.** GLA was given at a single bolus i.p injection with solvent as a vehicle control. (A) FeCl<sub>3</sub>-induced carotid artery injury mouse model was performed and the time to occlusion was measured using Visual Sonics View 2100 and analysed using Student T test (mean ± standard error, P < 0.001). (B) The distal 5 mm of the tail of anesthetized mice was transected and the time to bleeding cessation was recorded. Data were analyzed using GraphPad Prism 5.0 software with the Bonferroni post test for multiple groups (mean ± standard error, n=10 for each group) \*P < 0.05. N.S., not significant.

doi: 10.1371/journal.pone.0085120.g008

For *in vivo* studies, we examined the effect of GLA on thrombus formation using FeCl<sub>3</sub>-induced carotid artery injury model, which measures the thrombosis in the medium or large artery, and showed that GLA negatively regulates thrombus formation. Moreover, the thrombi in GLA-treated mice seemed less stable as there were 8 reflows and 2 non-occlusions in 16 mice tested compared to the vehicle control group with 4 reflows out of 16 mice (data not shown), implying that GLA possibly affects the stability of the thrombi. The benefit of an antithrombotic agent is the balance between efficacy in reduction of symptomatic thrombotic events and the risk for hemorrhage. Although GLA showed antiplatelet and antithrombotic effect, it has to be safe to be developed as a preventive or therapeutic agent. Our study confirmed that relatively lower doses (0.1–10mg/kg) of GLA administered via intraperitoneal injection did not cause significant bleeding tendency. However, a higher dose of GLA (15mg/kg) caused a significant increase in bleeding time. It should be pointed out that the doses used *in vitro* and *in vivo* in this study are not parallel since we did not measure the dynamics of GLA in plasma after injection. Therefore, it is unknown whether the

dose used here *in vivo* represent the low dose response *in vitro*. Further study is required to evaluate the effective and selective doses of GLA on antiplatelet and antithrombotic effect without bleeding tendency.

In summary, we have isolated and purified GLA, and established that the potent inhibitory action of GLA on platelet activation and thrombus formation is preferentially via GPVI-mediated signaling pathway. Although further work is required to determine the targets of GLA in platelets, the observations described in this study supply evidence that this natural compound may become a potential antiplatelet and antithrombotic agent.

## Author Contributions

Conceived and designed the experiments: JZ LZ. Performed the experiments: WL XRT WXY QL LJR XHL CJC. Analyzed the data: WL XRT WXY QL CJC JZ LZ. Contributed reagents/materials/analysis tools: YO JZ. Wrote the manuscript: WL XRT WXY YO JZ LZ.

## References

- Brass LF, Newman DK, Wannermacher KM, Zhu L, Stalker TJ (2013) Singal Transduction During Platelet Plug Formation. In: AD Michelson. PLATELETS. UK: Academic Press. pp. 367–398.
- Gibbins J AJ, Farndale R, Barnes M, Law CL, Watson SP (1996) Tyrosine phosphorylation of the Fc receptor gamma-chain in collagen-stimulated platelets. *J Biol Chem* 271: 18095–18099. doi:10.1074/jbc.271.30.18095. PubMed: 8663460.
- Poole A GJ, Turner M, van Vugt MJ, van de Winkel JGJ, Saito T et al. (1997) The Fc receptor g-chain and the tyrosine kinase Syk are essential for activation of mouse platelets by collagen. *EMBO J* 16: 2333–2341. doi:10.1093/emboj/16.9.2333. PubMed: 9171347.
- Gibbins JM, Shutes A, van Vugt MJ, deWinkel JGJ, Saito T et al. (1998) The p85 subunit of phosphatidylinositol 3-kinase associates with the Fc receptor gamma-chain and linker for activator of T cells (LAT) in platelets stimulated by collagen and convulxin. *J Biol Chem* 273: 34437–34443. doi:10.1074/jbc.273.51.34437. PubMed: 9852111.
- Weston C, Rao U (2003) Antiplatelet drugs in cardiovascular diseases. *Int J Clin Pract* 57: 898–905. PubMed: 14712893.
- Mehran R, Rao SV, Bhatt DL, Gibson CM, Caixeta A et al. (2011) Standardized bleeding definitions for cardiovascular clinical trials: a consensus report from the Bleeding Academic Research Consortium. *Circulation* 123: 2736–2747. doi:10.1161/CIRCULATIONAHA.110.009449. PubMed: 21670242.
- Hubbard GP, Wolfram S, Lovegrove JA, Gibbins JM (2004) Ingestion of quercetin inhibits platelet aggregation and essential components of the collagen-stimulated platelet activation pathway in humans. *J Thromb Haemost* 2: 2138–2145. doi:10.1111/j.1538-7836.2004.01067.x. PubMed: 15613018.
- Di Castelnuovo A, Rotondo S, Iacoviello L, Donati MB, De Gaetano G (2002) Meta-analysis of wine and beer consumption in relation to vascular risk. *Circulation* 105: 2836–2844. doi:10.1161/01.CIR.0000018653.19696.01. PubMed: 12070110.
- Huang ZS, Zeng CL, Zhu LJ, Jiang L, Li N et al. (2010) Salvianolic acid A inhibits platelet activation and arterial thrombosis via inhibition of phosphoinositide 3-kinase. *J Thromb Haemost* 8: 1383–1393. doi:10.1111/j.1538-7836.2010.03859.x. PubMed: 20345719.
- Sun HD, Huang SX, Han QB (2006) Diterpenoids from *Isodon* species and their biological activities. *Nat Prod Rep* 23: 673–698. doi:10.1039/b604174d. PubMed: 17003905.
- Hong SS, Lee SA, Han XH, Hwang JS, Lee C et al. (2008) ent-Kaurane diterpenoids from *Isodon japonicus*. *J Nat Prod* 71: 1055–1058. doi:10.1021/np0705965. PubMed: 18491868.
- Hong SS, Lee SA, Lee C, Han XH, Choe S et al. (2011) Dimeric ent-kaurane diterpenoids from *Isodon excisus*. *J Nat Prod* 74: 2382–2387. doi:10.1021/np200439n. PubMed: 22066578.
- Shen X, Cao L, Dong X, Gu X, Zhao F et al. (2011) Study on the Cytotoxic Effect of Glaucocalyxin A in Vitro. *Chinese Archives of Traditional Chinese Medicine* 29: 2.
- Yang WH, Zhang Z, Sima YH, Zhang J, Wang JW (2013) Glaucocalyxin A and B-induced cell death is related to GSH perturbation in human leukemia HL-60 cells. *Anticancer Agents Med Chem*, 13: 1280–90. PubMed: 23796245.
- Gao LW, Zhang J, Yang WH, Wang B, Wang JW (2011) Glaucocalyxin A induces apoptosis in human leukemia HL-60 cells through mitochondria-mediated death pathway. *Toxicol In Vitro* 25: 51–63. doi:10.1016/j.tiv.2010.09.006. PubMed: 20851175.
- Bin Z, Kun L (1992) Inhibition by glaucocalyxin A of aggregation of rabbit platelets induced by ADP, arachidonic acid and platelet-activating factor, and inhibition of [3H]-PAF binding. *Thromb Haemost* 67: 458–460. PubMed: 1631795.
- Zhang B, Long K (1993) Effects of glaucocalyxin A on aggregation and cAMP levels of rabbit platelets in vitro. *Zhongguo Yao Li Xue Bao* 14: 347–350. PubMed: 8249632.
- Mou P, Zeng Z, Li Q, Liu X, Xin X et al. (2013) Identification of a calmodulin-binding domain in Sema4D that regulates its exodomain shedding in platelets. *Blood* 121: 4221–4230. doi:10.1182/blood-2012-11-470609. PubMed: 23564909.
- Prevost N, Woulfe D, Tanaka T, Brass LF (2002) Interactions between Eph kinases and ephrins provide a mechanism to support platelet aggregation once cell-to-cell contact has occurred. *Proc Natl Acad Sci U S A* 99: 9219–9224. doi:10.1073/pnas.142053899. PubMed: 12084815.
- Zhang W, Liu J, Sun R, Zhao L, Du J et al. (2011) Calpain activator dibucaine induces platelet apoptosis. *Int J Mol Sci* 12: 2125–2137. doi:10.3390/ijms12042125. PubMed: 21731431.
- Gilio K, Harper MT, Cosemans JM, Konopatskaya O, Munnix IC et al. (2010) Functional divergence of platelet protein kinase C (PKC) isoforms in thrombus formation on collagen. *J Biol Chem* 285: 23410–23419. doi:10.1074/jbc.M110.136176. PubMed: 20479008.
- Wu Y, Ahmad SS, Zhou J, Wang L, Cully MP et al. (2012) The disulfide isomerase ERp57 mediates platelet aggregation, hemostasis, and thrombosis. *Blood* 119: 1737–1746. doi:10.1182/blood-2011-06-360685. PubMed: 22207737.
- Zhu L, Bergmeier W, Wu J, Jiang H, Stalker TJ et al. (2007) Regulated surface expression and shedding support a dual role for semaphorin 4D in platelet responses to vascular injury. *Proc Natl Acad Sci U S A* 104: 1621–1626. doi:10.1073/pnas.0606344104. PubMed: 17244710.
- Shattil SJ, Cunningham M, Hoxie JA (1987) Detection of activated platelets in whole blood using activation-dependent monoclonal antibodies and flow cytometry. *Blood* 70: 307–315. PubMed: 3297204.
- Neeves KB, Maloney SF, Fong KP, Schmaier AA, Kahn ML et al. (2008) Microfluidic focal thrombosis model for measuring murine

- platelet deposition and stability: PAR4 signaling enhances shear-resistance of platelet aggregates. *J Thromb Haemost* 6: 2193-2201. doi:10.1111/j.1538-7836.2008.03188.x. PubMed: 18983510.
26. Zhang B, Long K, Jiang Y (1992) Effects of glaucocalyxin A on PAF biosynthesis and arachidonic acid metabolism in washed rabbit platelets. *Chinese Journal of Pharmacology and Toxicology* 6: 52-55
27. Nieswandt B, Watson SP (2003) Platelet-collagen interaction: is GPVI the central receptor? *Blood* 102: 449-461. doi:10.1182/blood-2002-12-3882. PubMed: 12649139.
